# Supplementary material for: Phenol–Hyaluronic Acid Conjugates: Correlation of Oxidative Crosslinking Pathway and Adhesiveness
Source: MDPI journal article supplement (doi:10.3390/polym13183130), 2021-09-16
Supplement: s1 [file s1]

# Supplementary Materials: Phenol-hyaluronic Acid Conjugates: Correlation of Oxidative Crosslinking Pathway and Adhesiveness

Jungwoo Kim Sumin Kim, Donghee Son and Mikyung Shin

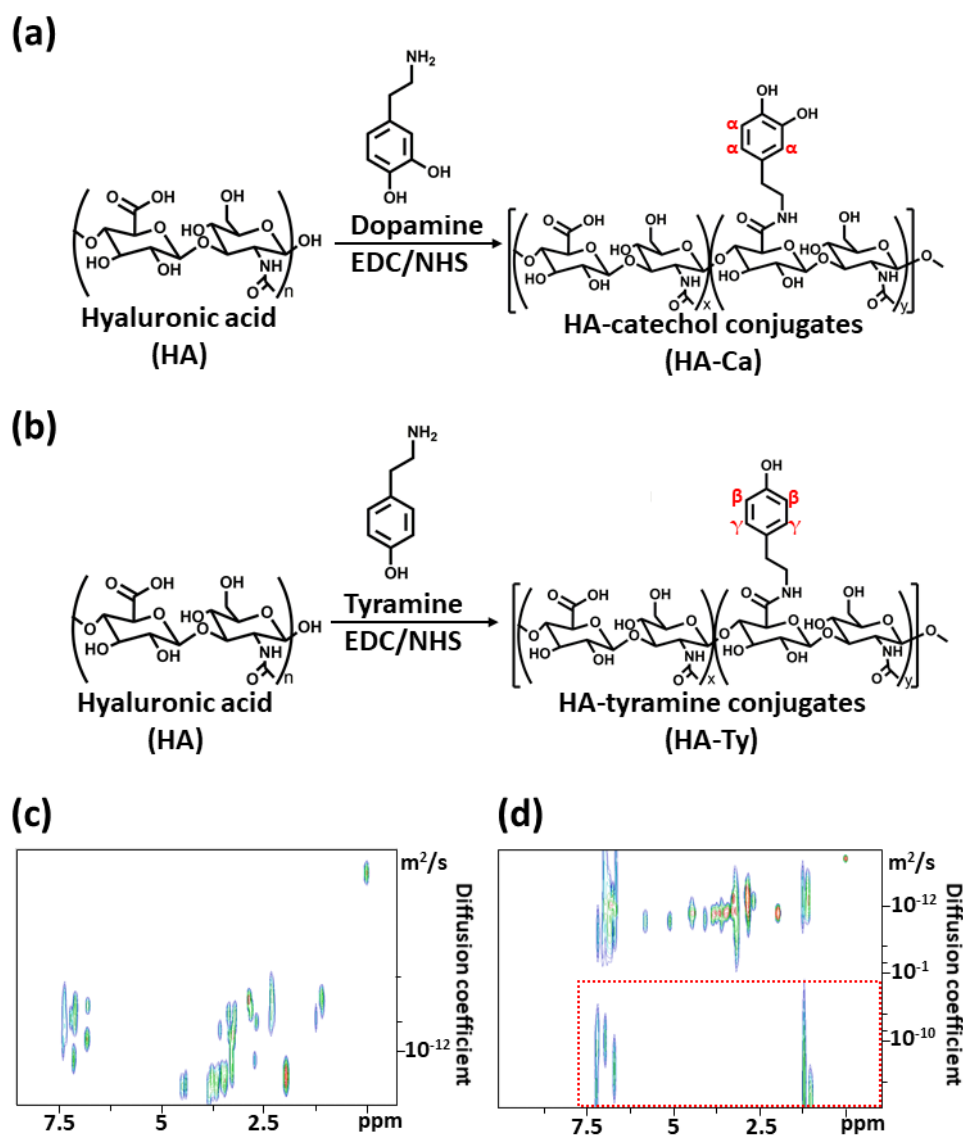

**Figure S1.** Synthesis and characterization of hyaluronic acid (HA)-phenol conjugates. (a) Hyaluronic acid-catechol conjugate (HA-Ca) and (b) hyaluronic acid-tyramine conjugate (HA-Ty) synthesized through carbodiimide coupling reaction. DOSY NMR spectra of HA-Ty (c) and HA-Ca (d) with their diffusion coefficient for evaluation of the sample purity.

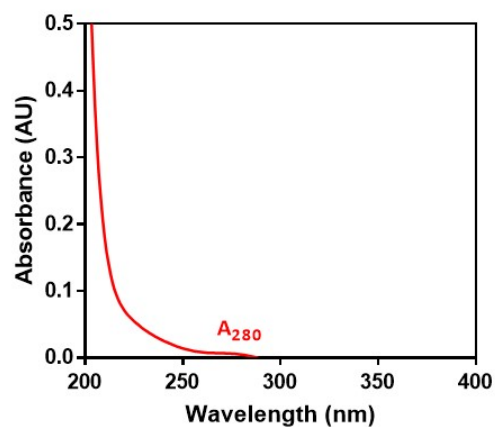

Figure S2. UV-vis spectra of free dopamine ( $A_{280}$ ) released from the HRP-induced HA-Ca hydrogels.

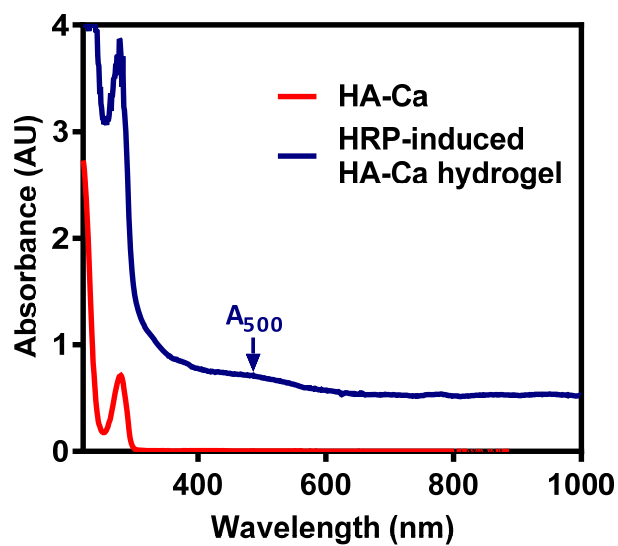

Figure S3. UV-vis spectra of HRP-induced HA-Ca hydrogel.

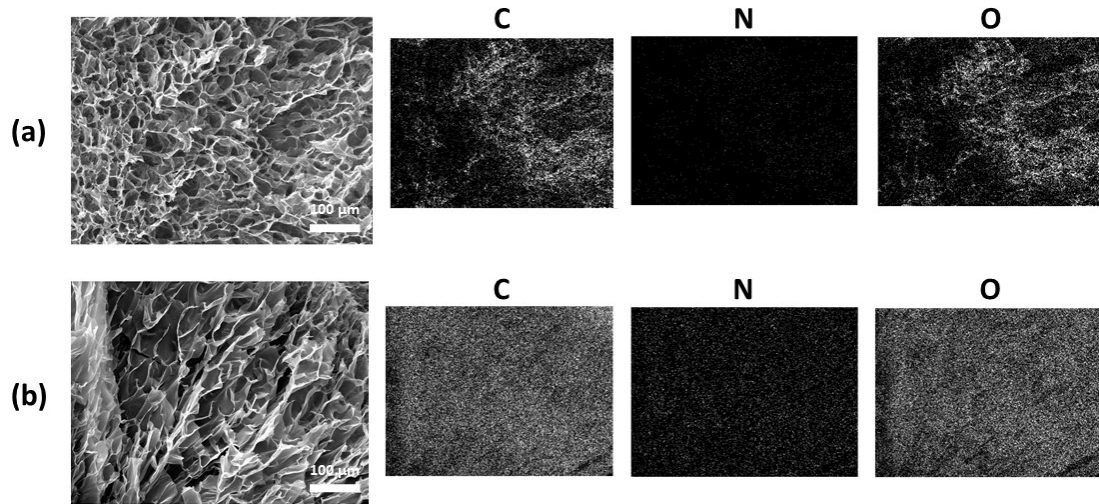

**Figure S4.** SEM images (1<sup>st</sup> photos) and EDS mapping (2<sup>nd</sup> image for carbon (C), 3<sup>rd</sup> image for nitrogen (N), and 4<sup>th</sup> image for oxygen (O)) of the lyophilized (a) HA-Ca and (b) HA-Ty hydrogels crosslinked by HRP/H<sub>2</sub>O<sub>2</sub> catalyzed reaction.

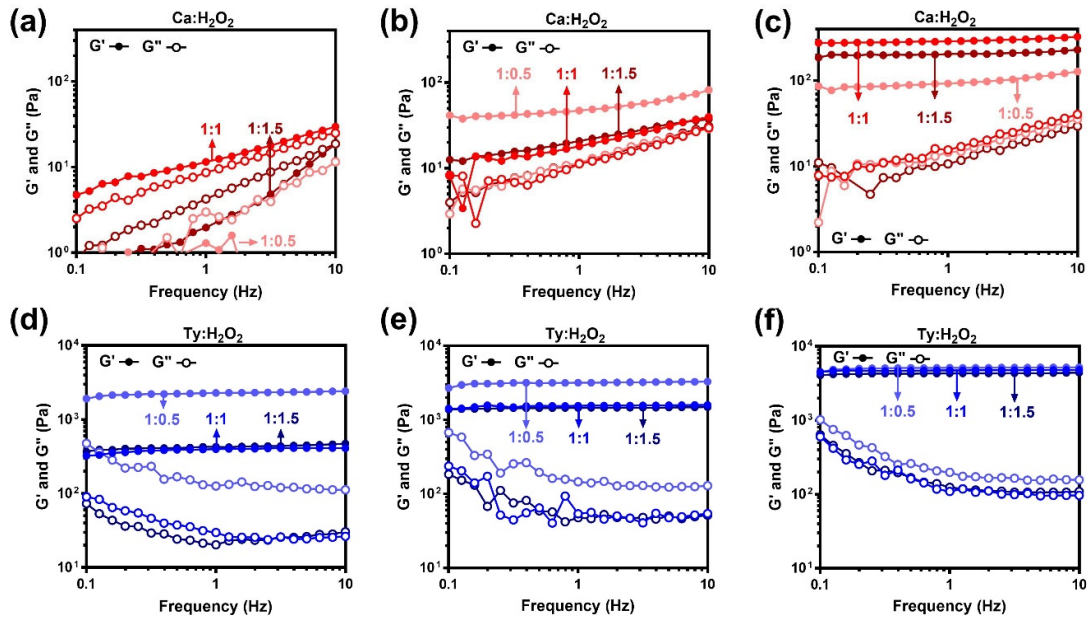

**Figure S5.** Rheological characterization of HRP-induced HA-Ca hydrogels in different molar ratios of Ca:H<sub>2</sub>O<sub>2</sub> at (a) 0.1 unit/ml of HRP concentration, (b) 0.3 unit/ml of HRP concentration, and (c) 0.9 unit/ml of HRP concentration. Rheological characterization of HRP-induced HA-Ty hydrogels in different molar ratios of Ty:H<sub>2</sub>O<sub>2</sub> at (d) 0.1 unit/ml of HRP concentration, (e) 0.3 unit/ml of HRP concentration, and (f) 0.9 unit/ml of HRP concentration.

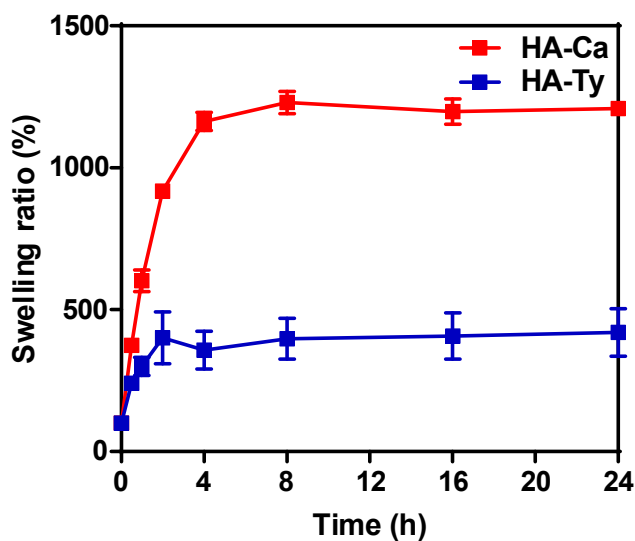

**Figure S6.** Swelling ratio (%) of HRP/H<sub>2</sub>O<sub>2</sub>-induced HA-Ca (red) and HA-Ty (blue) hydrogels as a function of time.

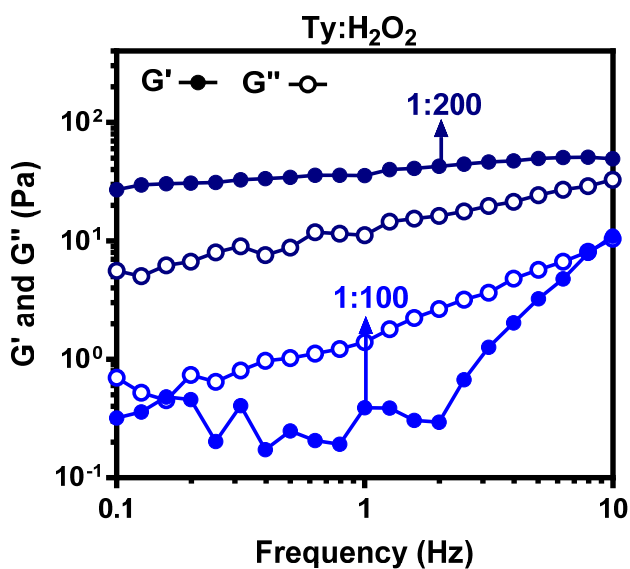

**Figure S7.** Rheological characterization of APS-induced HA-Ty hydrogels in different molar ratios of Ty:H<sub>2</sub>O<sub>2</sub>.

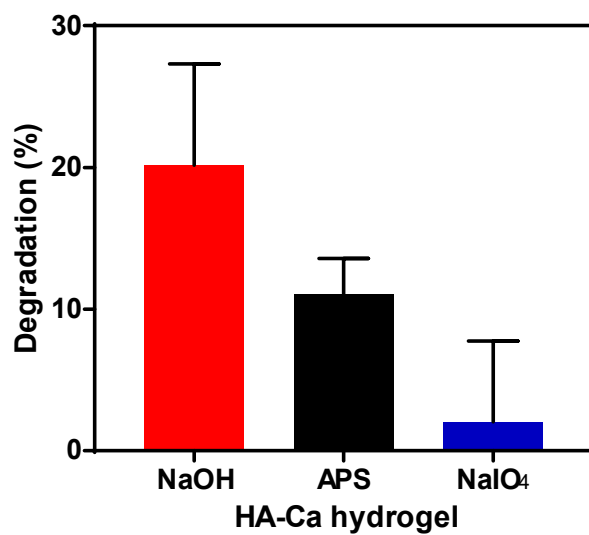

**Figure S8.** Degradation of HA-Ca hydrogels after swelling of 24 h. The hydrogels prepared in basic condition (pH 10) (red), and under treatment of APS (catechol : APS = 1:100) (black) or NaIO<sub>4</sub> (catechol : NaIO<sub>4</sub> = 1:1) (blue).
